# Supplementary material for: Changes of Cell Biochemical States Are Revealed in Protein Homomeric Complex Dynamics
Source: PubMed Central journal article supplement (PMC6242466; doi:10.1016/j.cell.2018.09.050), 2018-11-15
Supplement: mmc1.pdf [file mmc1.pdf]

**Cell, Volume 175**

**Supplemental Information**

**Changes of Cell Biochemical States Are Revealed  
in Protein Homomeric Complex Dynamics**

**Bram Stynen, Diala Abd-Rabbo, Jacqueline Kowarzyk, Leonor Miller-Fleming, Simran Kaur Aulakh, Philippe Garneau, Markus Ralser, and Stephen W. Michnick**

**Table S5. Significance of the overlap between metformin hits and homologs in the budding yeast for genes associated to different diseases in *Homo sapiens* (related to Figure 3).**

| Disease                                            | GWA studies (#) | Associated SNPs (#) | Mapped <i>Homo sapiens</i> genes (#) | Homolog ORFs in yeast (#) | Tested ORFs in metformin <i>hdPCA</i> (#) | Common ORFs with metformin <i>hdPCA</i> hits (#) | Hyper-geometric test ( <i>P</i> -value) |
|----------------------------------------------------|-----------------|---------------------|--------------------------------------|---------------------------|-------------------------------------------|--------------------------------------------------|-----------------------------------------|
| Breast cancer                                      | 30              | 135                 | 138                                  | 41                        | 26                                        | 3                                                | 0.937                                   |
| Breast cancer (early onset)                        | 1               | 18                  | 11                                   | 10                        | 8                                         | 1                                                | 0.852                                   |
| Colorectal cancer                                  | 20              | 82                  | 75                                   | 22                        | 19                                        | 4                                                | 0.599                                   |
| Epithelial ovarian cancer                          | 2               | 22                  | 54                                   | 16                        | 11                                        | 3                                                | 0.424                                   |
| Lung cancer                                        | 11              | 27                  | 43                                   | 11                        | 9                                         | 1                                                | 0.883                                   |
| Ovarian cancer                                     | 5               | 15                  | 44                                   | 13                        | 10                                        | 2                                                | 0.661                                   |
| Pancreatic cancer                                  | 6               | 48                  | 121                                  | 28                        | 20                                        | 2                                                | 0.946                                   |
| Prostate cancer                                    | 23              | 142                 | 313                                  | 69                        | 42                                        | 15                                               | 0.021                                   |
| Type 2 diabetes   Type 2 diabetes and other traits | 42              | 231                 | 185                                  | 45                        | 26                                        | 11                                               | 0.012                                   |

**Table S6. Common ORFs between metformin hits and homologs in the budding yeast for genes associated with type 2 diabetes in *Homo sapiens* (related to Figure 3).**

| Yeast ORF      | Yeast Name   | Homologs in <i>Homo sapiens</i> | GWAS # showing disease association | Pubmed ID                                                                                                   | Description                                                            |
|----------------|--------------|---------------------------------|------------------------------------|-------------------------------------------------------------------------------------------------------------|------------------------------------------------------------------------|
| <i>YBR164C</i> | <i>ARL1</i>  | <i>ARL15</i>                    | 1                                  | 24509480                                                                                                    | Soluble GTPase with a role in regulation of membrane traffic           |
| <i>YOL016C</i> | <i>CMK2</i>  | <i>CAMK1D</i>                   | 3                                  | 18372903 20862305 22961080                                                                                  | Calmodulin-dependent protein kinase                                    |
| <i>YGL190C</i> | <i>CDC55</i> | <i>PPP2R2C</i>                  | 1                                  | 19734900                                                                                                    | Non-essential regulatory subunit B of protein phosphatase 2A (PP2A)    |
| <i>YOR316C</i> | <i>COT1</i>  | <i>SLC30A8</i>                  | 12                                 | 17293876 17460697 17463246 19056611 19401414 17463248 17463249 19734900 20581827 22693455 23945395 24509480 | Vacuolar transporter that mediates zinc transport into the vacuole     |
| <i>YHR132C</i> | <i>ECM14</i> | <i>CPA6</i>                     | 1                                  | 25102180                                                                                                    | Putative metalloprotease with similarity to zinc carboxypeptidases     |
| <i>YIL097W</i> | <i>FYV10</i> | <i>MAEA</i>                     | 2                                  | 22158537 23945395                                                                                           | Subunit of GID complex                                                 |
| <i>YKL101W</i> | <i>HSL1</i>  | <i>HUNK</i>                     | 1                                  | 21490949                                                                                                    | Nim1p-related protein kinase                                           |
| <i>YMR165C</i> | <i>PAH1</i>  | <i>LPIN2</i>                    | 1                                  | 21490949                                                                                                    | Mg <sup>2+</sup> -dependent phosphatidate (PA) phosphatase             |
| <i>YER165W</i> | <i>PAB1</i>  | <i>RBMS1</i>                    | 1                                  | 20418489                                                                                                    | Poly(A) binding protein                                                |
| <i>YLR403W</i> | <i>SFP1</i>  | <i>JAZF1</i>                    | 3                                  | 20581827 24509480 18372903                                                                                  | Regulates transcription of ribosomal protein and biogenesis genes      |
| <i>YIL030C</i> | <i>SSM4</i>  | <i>MARCH1</i>                   | 1                                  | 21490949                                                                                                    | Ubiquitin-protein ligase involved in ER-associated protein degradation |

**Table S7. Common ORFs between metformin hits and homologs in the budding yeast for genes associated with prostate cancer in *Homo sapiens* (related to Figure 3).**

| Yeast ORF | Yeast Name | Homologs in <i>Homo sapiens</i> | GWAS # showing disease association | Pubmed ID | Description                                                            |
|-----------|------------|---------------------------------|------------------------------------|-----------|------------------------------------------------------------------------|
| YJR057W   | CDC8       | DTYMK                           | 1                                  | 23535732  | Thymidylate and uridylate kinase                                       |
| YKR034W   | DAL80      | GATA5                           | 1                                  | 23535732  | Negative regulator of genes in multiple nitrogen degradation pathways  |
| YKL002W   | DID4       | LINC00506 / CHMP2B              | 1                                  | 19767753  | Class E Vps protein of the ESCRT-III complex                           |
| YJL110C   | GZF3       | GATA5                           | 1                                  | 23535732  | GATA zinc finger protein                                               |
| YAL029C   | MYO4       | MYO6                            | 1                                  | 25217961  | Type V myosin motor involved in actin-based transport of cargos        |
| YBR055C   | PRP6       | PRPF6                           | 1                                  | 23535732  | Splicing factor                                                        |
| YGR132C   | PHB1       | PHB                             | 1                                  | 23535732  | Subunit of the prohibitin complex (Phb1p-Phb2p)                        |
| YER095W   | RAD51      | RAD51B                          | 1                                  | 23535732  | Strand exchange protein                                                |
| YJL026W   | RNR2       | RRM2                            | 1                                  | 23535732  | Ribonucleotide-diphosphate reductase (RNR), small subunit              |
| YJL080C   | SCP160     | HDLBP                           | 1                                  | 23535732  | Essential RNA-binding G protein effector of mating response pathway    |
| YLR403W   | SFP1       | JAZF1                           | 1                                  | 18264096  | Regulates transcription of ribosomal protein and biogenesis genes      |
| YDR523C   | SPS1       | STK25                           | 1                                  | 23535732  | Putative protein serine/threonine kinase                               |
| YIL030C   | SSM4       | MARCH8                          | 1                                  | 25217961  | Ubiquitin-protein ligase involved in ER-associated protein degradation |
| YDL185W   | VMA1       | ATP6V1A                         | 1                                  | 23535732  | Subunit A of the V1 peripheral membrane domain of V-ATPase             |
| YFL021W   | GAT1       | GATA5                           | 1                                  | 23535732  | Transcriptional activator of nitrogen catabolite repression genes      |
